# Supplementary material for: A seed-like structured Mo@ZrS2 catalyst on graphene nanosheets for boosting the performance of rechargeable Zn–air batteries
Source: Royal Society of Chemistry journal article supplement (doi:10.1039/d4nr01191k), 2024-01-01
Supplement: d4nr01191k1.pdf [file d4nr01191k1.pdf]

## Supporting Information

### **A seed-like structured Mo@ZrS<sub>2</sub> catalyst on graphene nanosheets for boosting the performance of rechargeable Zn–air batteries**

Ramasamy Santhosh kumar<sup>a</sup>, Dilmurod Sayfiddinov<sup>a</sup>, S Tamilarasi<sup>a</sup>, Dong Jin Yoo<sup>a,b\*</sup>

<sup>a</sup>Department of Energy Storage/Conversion Engineering of Graduate School (BK21 FOUR), Hydrogen and Fuel Cell Research Center, Jeonbuk National University, Jeonju, Jeollabuk-do, 54896 Republic of Korea

<sup>b</sup>Department of Life Science, Jeonbuk National University, Jeonju-si, Jeollabuk-do, 54896 Republic of Korea

Corresponding Email ID: [djyoo@jbnu.ac.kr](mailto:djyoo@jbnu.ac.kr)

Fax: +82-(0) 63-270-3909 Tel: +82-(0) 63-270- 3608

## **Material characterizations**

A high-resolution electron transmission microscope, a field-emitting scanning electron microscope, an HR-TEM (JEM-ARM200F, JEOL), and the energy dispersive X-ray spectroscopy (EDS (SUPRA 40 VP; Carl Zeiss, Germany) were used to evaluate the morphology of all produced electrocatalysts. The X-ray diffraction (XRD) patterns of the produced electrocatalysts were analyzed using Cu K radiation ( $\lambda = 0.154$  nm) and a PANalytical (X'PERT-PRO Powder) model. At the Centers over University-wide Research Facilities (CURF) of Jeonbuk National University (JBNU), Republic of Korea, the Raman spectrum of the catalysts was measured employing high-performance 3D mapping Imaging Raman spectroscopy with NANO PHOTON (RAMAN Touch), equipped with a 532 nm helium-neon laser. At the Korean Basic Science Institutes of Jeonju Center (KBSI), Republic of Korea, the chemical condition of the materials was investigated utilizing an X-ray photoelectron spectrometer (XPS; Axis-Nova, Kratos Inc.), and a Brunauer–Emmett–Teller (BET) Autosorb–iQ 2ST/MP physisorption analyzer was used to measure the surface area of the produced catalyst.

## **Electrochemical measurements**

The ORR activities were carried out using A Gamry Reference 600 Potentiostat/Galvanostat/ZRA electrochemical workstation combined with a rotating ring-disk electrode (RRDE) rotator RRDE-3A (ALS Co., Japan). Platinum wire, Ag/AgCl, and RDE (diameter of 5 mm: 0.19625 cm<sup>2</sup>) were used as the counter, reference, and working electrodes, respectively. 5 mg of the catalyst and 30  $\mu$ L of 5% Nafion solution were dispersed in 1 mL of ethanol and DI water (3:1) solution and the mixture was sonicated for 60 minutes to create a homogenous ink. A similar procedure was used to obtain conventional Pt-C ink, and the results were compared with those obtained with a

commercial catalyst. After that, a rotating disk electrode was drop-coated with 15  $\mu\text{L}$  of catalyst ink.  $\text{N}_2$  or  $\text{O}_2$  saturated 0.1 M KOH electrolyte was used for both cyclic voltammetry (CV: scan rate 50  $\text{mV s}^{-1}$ ) and linear-sweep voltammetry (LSV: 10  $\text{mV s}^{-1}$ ). LSV was conducted with a voltage window of 0.2–0.8 V vs. Ag/AgCl, and various RDE rotational speeds ranging from 400 to 2800 rpm.  $\text{N}_2$  was purged in the 0.1 M KOH electrolyte for 30 minutes before each ORR measurement to maintain  $\text{O}_2$  saturation during the experiments. Calculation for number of electron transfer during ORR, Plots of Koutecky–Levich (K–L) were employed to calculate the quantity of electrons moved at different potentials ( $J^{-1}$  vs  $\omega^{-1/2}$ )<sup>1</sup>.

$$\frac{1}{J} = \frac{1}{J_L} + \frac{1}{J_K} = \frac{1}{B\omega^{1/2}} + \frac{1}{J_K} \quad (1)$$

$$B = 0.62 nF C_0 D_0^{\frac{2}{3}} \nu^{-1/6} \quad (2)$$

Where,  $J$ ,  $J_L$ , and  $J_K$  are measured current density, diffusion-limiting current density and kinetic – limiting current density, respectively.

### **Zinc-air Battery Test**

Carbon paper foam ( $\sim 1 \text{ cm}^2$ ) was treated with  $\text{ZrS}_2/\text{rGO}$  and  $\text{Mo}@\text{ZrS}_2/\text{rGO}$  catalytic inks, each with a 3  $\text{mg cm}^{-2}$  catalyst concentration. A zinc-air battery was constructed using an air cathode made of 0.25 mm thick zinc foil (Alfa Aesar, UK) and an electrolyte consisting of 6 M KOH and 0.2 M  $\text{Zn}(\text{CH}_3\text{COO})_2$ . Utilizing a Gamry 600 electrochemical workstation, durability testing for long-term charge discharge cycles was investigated. By the same process, a ventilation cathode electrode made of Pt-C (20 weight percent) was also produced. Equations 1 and 2 were utilized to

determine the specific capacity ( $\text{mA h g}^{-1}$ ) and power density ( $\text{mW cm}^{-2}$ ) of zinc-air batteries employing Pt-C,  $\text{ZrS}_2/\text{rGO}$ , and  $\text{Mo@ZrS}_2/\text{rGO}$  as the ambient cathode.<sup>2</sup>

$$\text{Power density (mW cm}^{-2}\text{)} = \text{Voltage} \times \text{current density} \quad (3)$$

$$\text{Specific capacity (mA h g}^{-1}\text{)} = \text{current} \times \text{service hours/weight of consumed Zn} \quad (4)$$

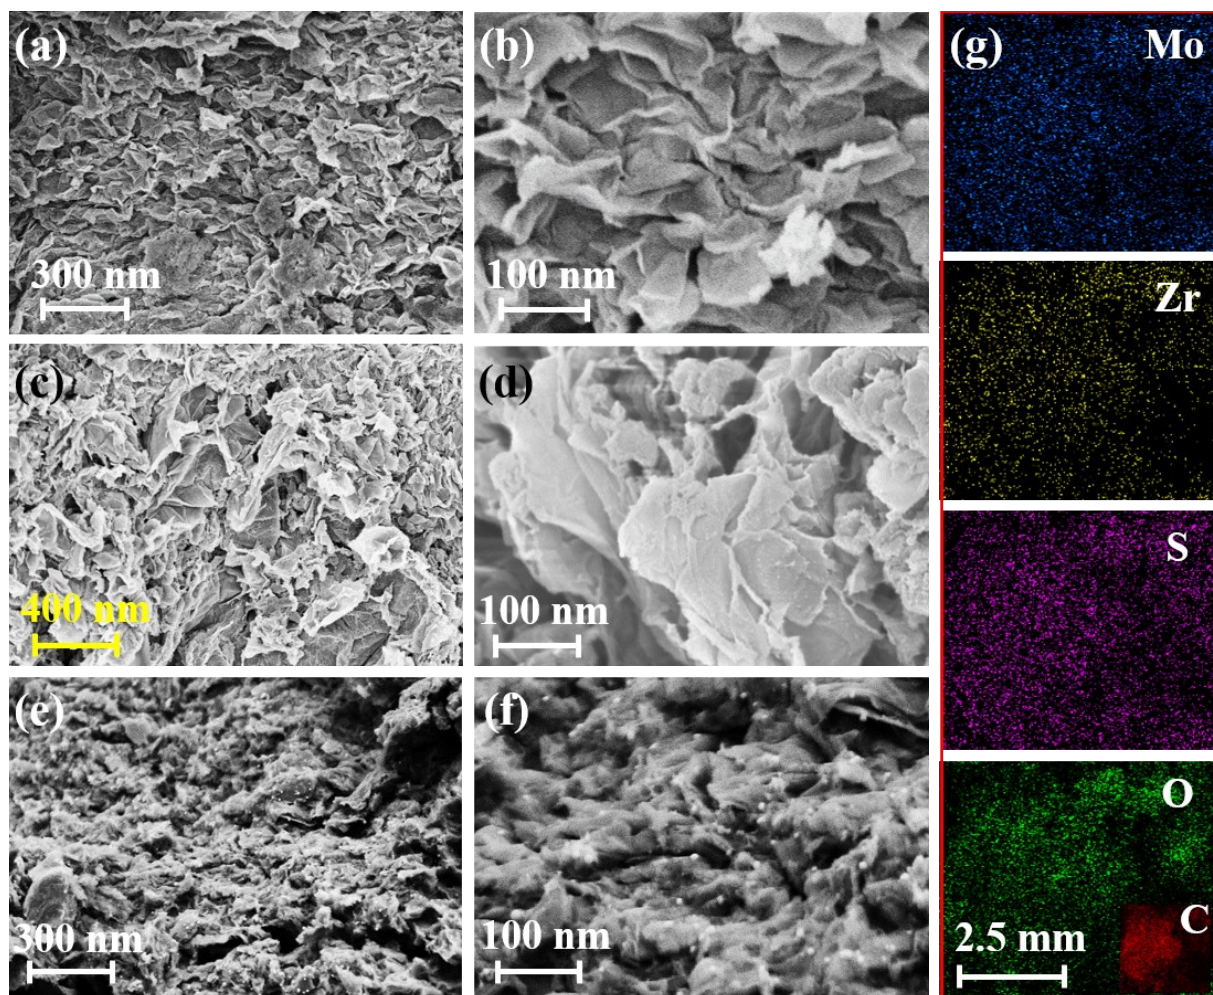

**Fig. S1** SEM images of (a, b) graphene oxide nanosheets, (c, d)  $\text{ZrS}_2/\text{rGO}$  catalyst, (e, f)  $\text{Mo@ZrS}_2/\text{rGO}$  catalyst, and (g) EDS-elemental mapping of  $\text{Mo@ZrS}_2/\text{rGO}$  catalyst for following elements Mo, Zr, S, O, and C.

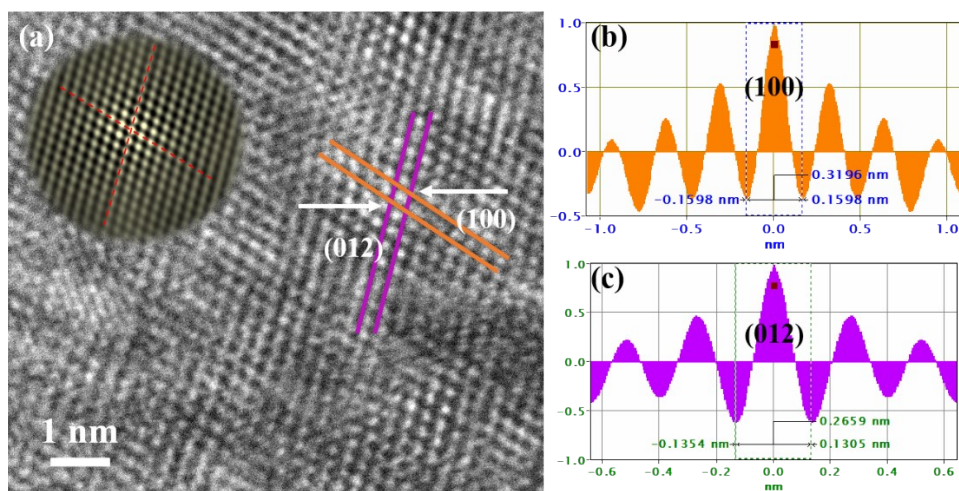

**Fig. S2** (a) HR-TEM image and (b, c) corresponding lattice space line of Mo@ZrS<sub>2</sub>/rGO catalyst.

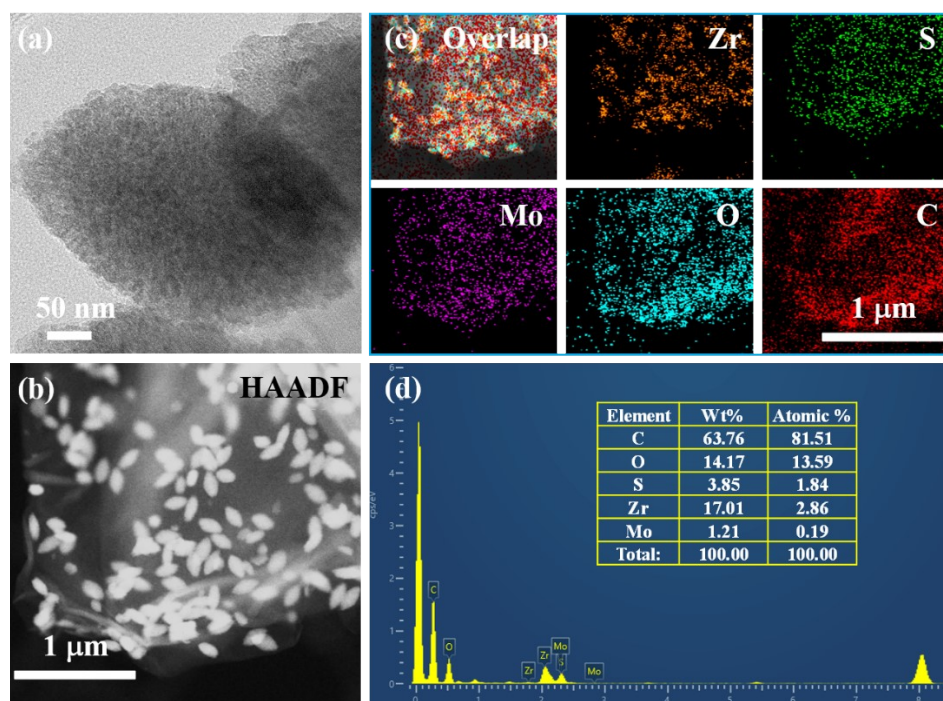

**Fig. S3** TEM images of Mo@ZrS<sub>2</sub>/rGO catalyst; (a, b) TEM and HAADF images, (c) TEM-EDS elemental mapping for Mo, Zr, S, O, and C elements, (d) TEM-EDX spectrum (insert image; corresponding elemental percentages).



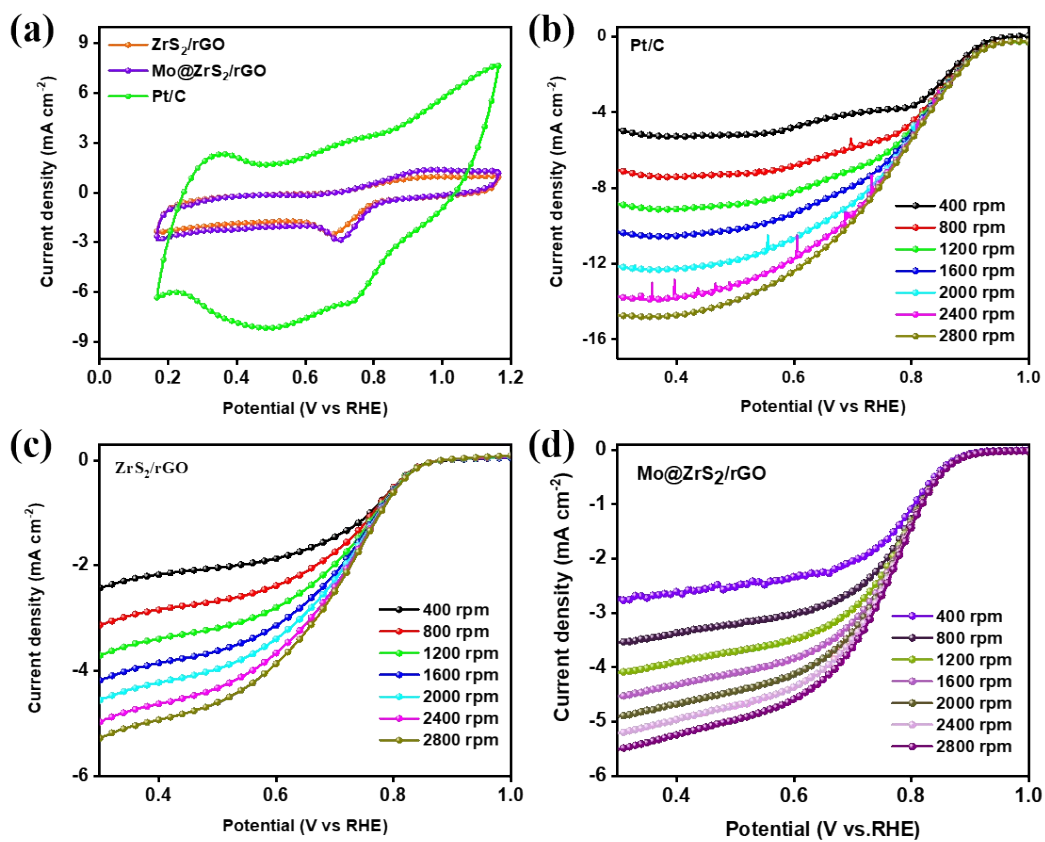

**Fig. S4** ORR performance in 0.1 M KOH solution; (a) CV curves, (b, c, d) LSV curves of different rotating speeds for 400-2800 rpm for Pt-C, ZrS<sub>2</sub>/rGO, and Mo@ZrS<sub>2</sub>/rGO electrocatalysts.

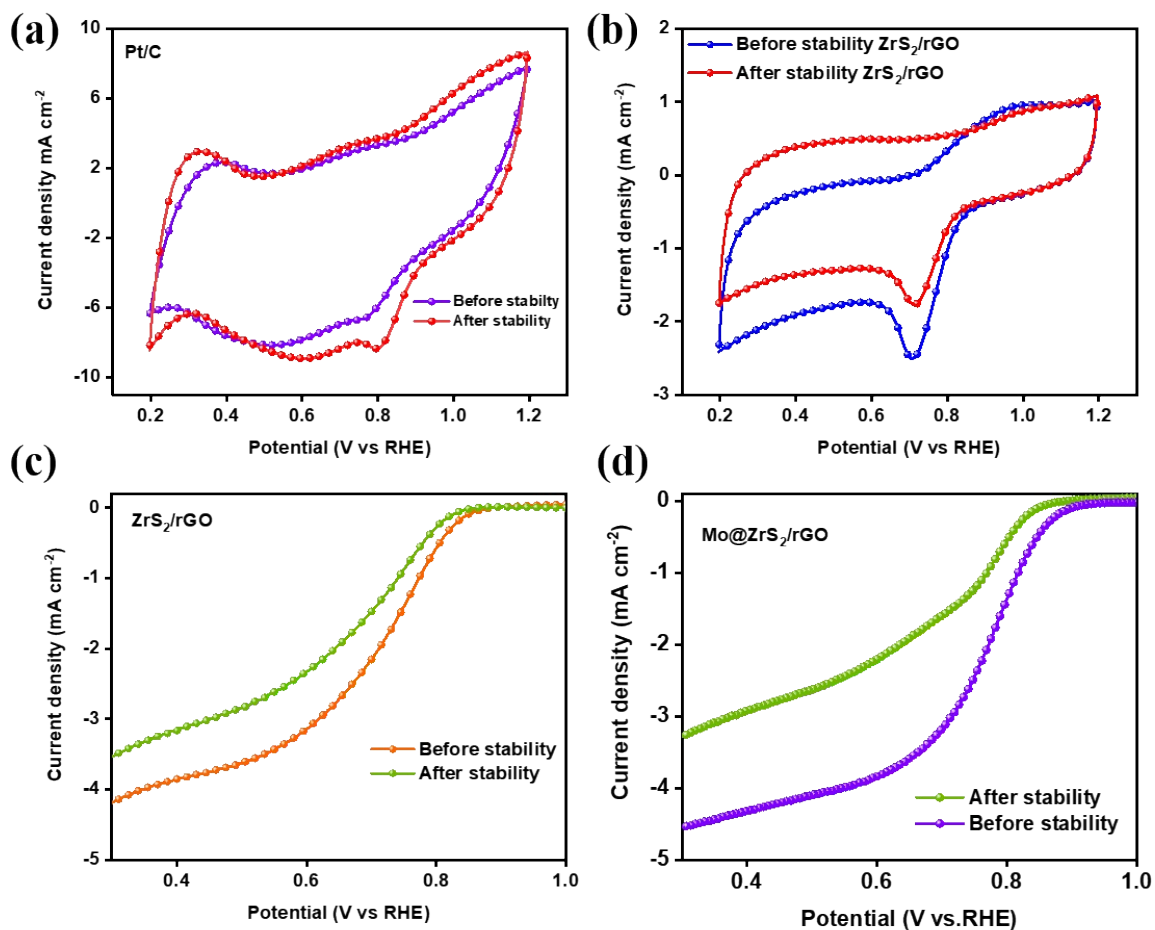

**Fig. S5** ORR study after stability analysis; (a, b) before and after stability CV curves of Pt-C and ZrS<sub>2</sub>/rGO electrocatalysts, (c, d) before and after stability LSV curves of ZrS<sub>2</sub>/rGO and Mo@ZrS<sub>2</sub>/rGO electrocatalysts, respectively.

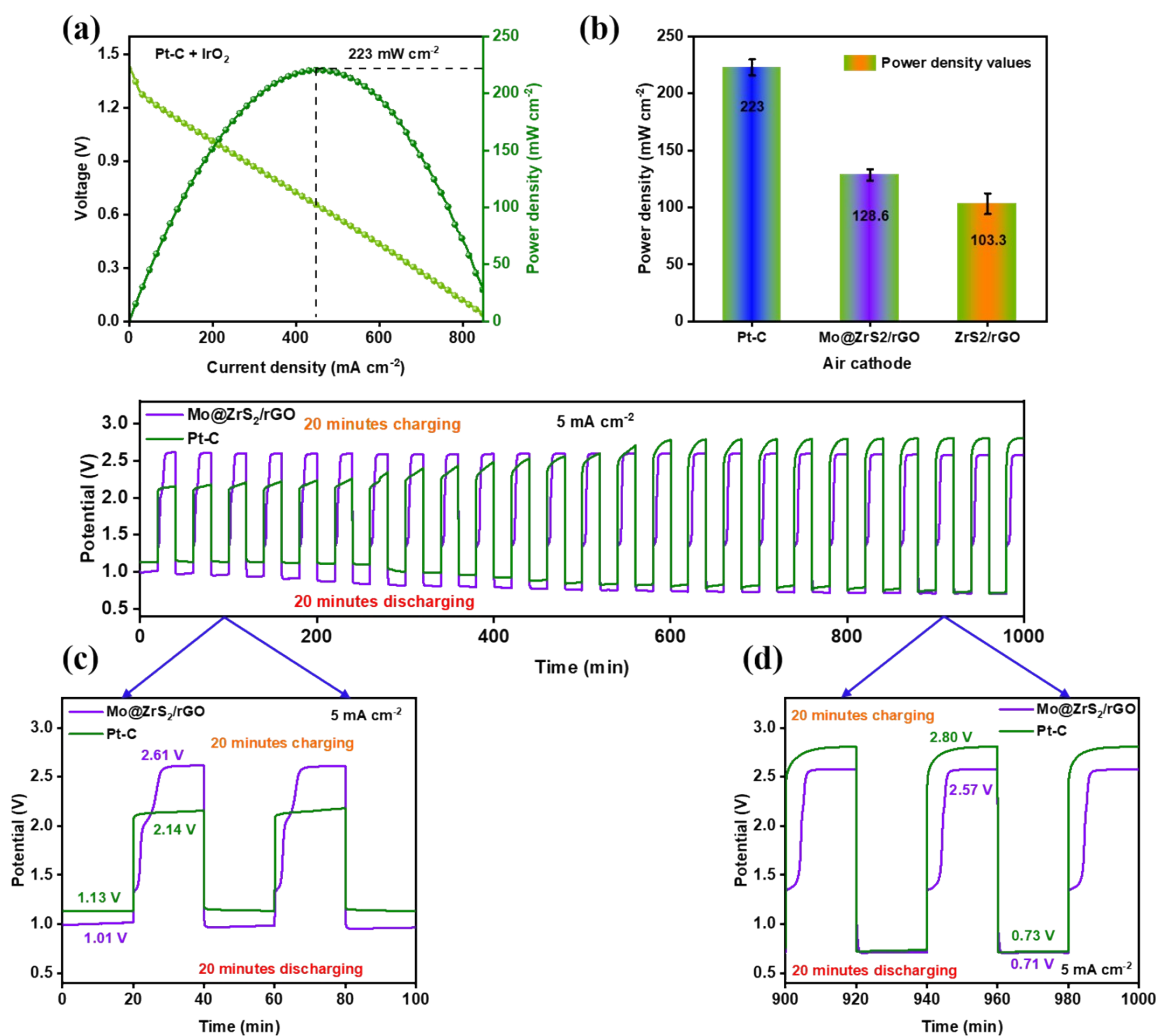

**Fig. S6** (a) Power density curve of commercial Pt-C catalyst, (b) comparison of power density for commercial Pt-C, Mo@ZrS<sub>2</sub>/rGO, and ZrS<sub>2</sub>/rGO air cathode catalysts, respectively. (c, d) Zn-air batteries potential differences.



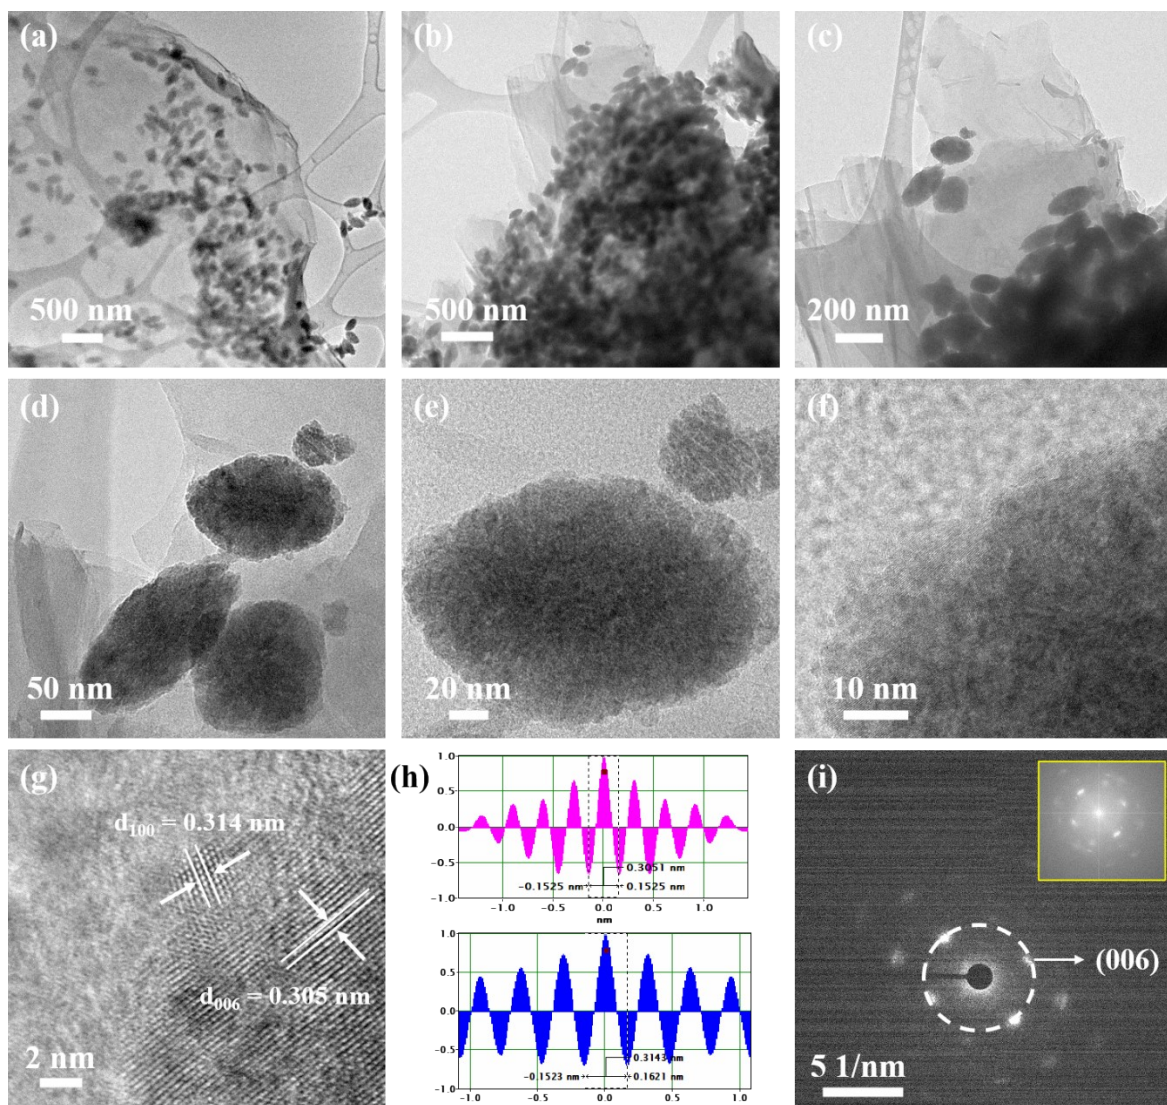

**Fig. S7** post-morphology study for after ORR cyclic stability; (a-f) TEM images, (g) HR-TEM image, (h) lattice space crystal line, and (i) SAED pattern (insert image; FFT pattern) of Mo@ZrS<sub>2</sub>/rGO catalyst.

**Table S1.** Comparison table of molybdenum based electrocatalysts for ORR (half wave potential) and Zn-air battery (power density) performances.

| S.No | Catalysts                                              | Half-wave potential (V) | Power density (mW cm <sup>-2</sup> ) | Year of publication | References    |
|------|--------------------------------------------------------|-------------------------|--------------------------------------|---------------------|---------------|
| 1    | Mo@ZrS <sub>2</sub> /rGO                               | 0.80                    | 128.6                                | 2024                | This work     |
| 2    | NiCoMoO <sub>4</sub> @rGO                              | 0.81                    | 125.1                                | 2023                | <sup>3</sup>  |
| 3    | Ni <sub>0.5</sub> Mo <sub>0.5</sub> OSe                | 0.88                    | 166.7                                | 2021                | <sup>4</sup>  |
| 4    | β-Mo <sub>2</sub> C-Co                                 | 0.74                    | 162                                  | 2023                | <sup>5</sup>  |
| 5    | O-Co <sub>0.5</sub> Mo <sub>0.5</sub> Se <sub>2</sub>  | 0.83                    | 120.2                                | 2020                | <sup>6</sup>  |
| 6    | Co-Co <sub>6</sub> Mo <sub>6</sub> C <sub>2</sub> @NPC | 0.81                    | 160.5                                | 2023                | <sup>7</sup>  |
| 7    | NC@MoS <sub>2</sub> @Co-Fe                             | 0.73                    | 97.1                                 | 2022                | <sup>8</sup>  |
| 8    | ZnCo-NCNT/Mo <sub>2</sub> C-800                        | 0.82                    | 231.6                                | 2023                | <sup>9</sup>  |
| 9    | Co(Zn <sub>0.5</sub> )@MoS <sub>2</sub> /CC            | 0.82                    | 72.4                                 | 2023                | <sup>10</sup> |
| 10   | Mo <sub>2</sub> C/MoC/Co@CNTs                          | 0.82                    | 134                                  | 2024                | <sup>11</sup> |
| 11   | FeCo-Mo <sub>0.82</sub> N                              | 0.78                    | 149.7                                | 2023                | <sup>12</sup> |
| 12   | MoP@N, P-HCF                                           | 0.73                    | 93.8                                 | 2021                | <sup>13</sup> |
| 13   | P-MoO <sub>2</sub>                                     | 0.78                    | 104.6                                | 2023                | <sup>14</sup> |
| 14   | Meso-Mo <sub>2</sub> C/C-0                             | 0.81                    | 115                                  | 2023                | <sup>15</sup> |
| 15   | NiCo <sub>2</sub> O <sub>4</sub> /Mo <sub>2</sub> C/CC | 0.79                    | 104                                  | 2021                | <sup>16</sup> |
| 16   | NiFeMo@N-rGO-3                                         | 0.83                    | 120                                  | 2021                | <sup>17</sup> |

## References

1. Y. Liang, Y. Li, H. Wang, J. Zhou, J. Wang, T. Regier and H. Dai, Co<sub>3</sub>O<sub>4</sub> nanocrystals on graphene as a synergistic catalyst for oxygen reduction reaction, *Nature Materials*, 2011, **10**, 780-786.
2. R. S. Kumar, S. Prabhakaran, S. Ramakrishnan, S. C. Karthikeyan, A. R. Kim, D. H. Kim and D. J. Yoo, Developing Outstanding Bifunctional Electrocatalysts for Rechargeable Zn-Air Batteries Using High-Purity Spinel-Type ZnCo<sub>2</sub>Se<sub>4</sub> Nanoparticles, *Small*, 2023, **19**, 2207096.
3. R. S. Kumar, P. Mannu, S. Prabhakaran, T. T. T. Nga, Y. Kim, D. H. Kim, J.-L. Chen, C.-L. Dong and D. J. Yoo, Trimetallic Oxide Electrocatalyst for Enhanced Redox Activity in Zinc–Air Batteries Evaluated by In Situ Analysis, *Advanced Science*, 2023, **10**, 2303525.
4. J. Balamurugan, T. T. Nguyen, D. H. Kim, N. H. Kim and J. H. Lee, 3D nickel molybdenum oxyselenide (Ni<sub>1-x</sub>Mo<sub>x</sub>OSe) nanoarchitectures as advanced multifunctional catalyst for Zn-air batteries and water splitting, *Applied Catalysis B: Environmental*, 2021, **286**, 119909.
5. W. Liu, X. Dai, W. Guo, J. Tang, J. Feng, D. Zheng, R. Yin, Y. Wang, W. Que, F. Wu, W. Shi and X. Cao, Phase Engineering of Molybdenum Carbide–Cobalt Heterostructures for Long-Lasting Zn-Air Batteries, *ACS Applied Materials & Interfaces*, 2023, **15**, 41476-41482.
6. S. Prabhakaran, J. Balamurugan, N. H. Kim and J. H. Lee, Hierarchical 3D Oxygenated Cobalt Molybdenum Selenide Nanosheets as Robust Trifunctional Catalyst for Water Splitting and Zinc–Air Batteries, *Small*, 2020, **16**, 2000797.
7. Y. Li, H. Wang, H. An, X. Liu, S. Chen and X.-Z. Song, Nano bowl-like cobalt–cobalt molybdenum carbide coated by N,P co-doped carbon as an advanced bifunctional oxygen electrocatalyst for rechargeable Zn–air batteries, *Dalton Transactions*, 2023, **52**, 6254-6259.
8. X. Shang, Q. Shen, Y. Xiong, Z. Jiang, C. Qin, X. Tian, X. Yang and Z.-J. Jiang, Effect of Co-Fe alloy nanoparticles on the surface electronic structure of molybdenum disulfide nanosheets and its application as a bifunctional catalyst for rechargeable zinc air battery, *Journal of Alloys and Compounds*, 2022, **916**, 165482.

9. F. Li, J. Niu, Y. Liu, T. Qin, D. Zhao, Q. Zhao and X. Liu, One-dimensional hierarchical ZnCo-NCNT/Mo<sub>2</sub>C nanostructure as a high-efficiency bifunctional catalyst for rechargeable Zn-air batteries, *Journal of Power Sources*, 2023, **553**, 232310.
10. X. Dong, J. Zhang, W. Shi, B. Wu, G. Wang, J. Chen and R. Wang, Heterointerfacial Cobalt/Zinc Sulfides on Molybdenum Disulfide Coated Carbon Cloth as Self-Supporting Electrode for Flexible Metal-Air Batteries, *ChemCatChem*, 2023, **15**, e202201472.
11. C. Xu, J. Zuo, J. Wang and Z. Chen, Hierarchically structured Mo<sub>1-2</sub>C/Co-encased carbon nanotubes with multi-component synergy as bifunctional oxygen electrocatalyst for rechargeable Zn-air battery, *Journal of Power Sources*, 2024, **595**, 234063.
12. W. Liu, X. Niu, J. Feng, R. Yin, S. Ma, W. Que, J. Dai, J. Tang, F. Wu, W. Shi, X. Liu and X. Cao, Tunable Heterogeneous FeCo Alloy-Mo<sub>0.82</sub>N Bifunctional Electrocatalysts for Temperature-Adapted Zn–Air Batteries, *ACS Applied Materials & Interfaces*, 2023, **15**, 15344-15352.
13. M. He, C. Shu, R. Zheng, M. Li, Z. Ran, Y. Yan, D. Du, L. Ren and J. Long, Interfacial interaction between molybdenum phosphide and N, P co-doped hollow carbon fibers boosting the oxygen electrode reactions in zinc-air batteries, *Electrochimica Acta*, 2021, **395**, 139211.
14. X. Cui, Y. Tao, X. Xu and G. Yang, P-doping optimized d-band center position in MoO<sub>2</sub> with enhanced oxygen reduction reaction and oxygen evolution reaction activities for rechargeable Zn-air battery, *Journal of Power Sources*, 2023, **557**, 232519.
15. J.-Y. Zhang, C. Xia, Y. Su, L. Zu, Z. Zhao, P. Li, Z. Lv, J. Wang, B. Mei, K. Lan, T. Zhao, P. Zhang, W. Chen, S. Zaman, Y. Liu, L. Peng, B. Y. Xia, A. Elzatahry, W. Li and D. Zhao, Boosted Oxygen Kinetics of Hierarchically Mesoporous Mo<sub>2</sub>C/C for High-current-density Zn–air Battery, *Small*, 2023, **n/a**, 2307378.
16. C. Xu, Q. Wang, S. Zhao and S. Wang, NiCo<sub>2</sub>O<sub>4</sub> nanoneedle/Mo<sub>2</sub>C-coated carbon cloth as efficient catalyst for water splitting and metal-air battery, *Synthetic Metals*, 2021, **280**, 116894.
17. W. Zeng, C. Wei, K. Zeng, X. Cao, M. H. Rummeli and R. Yang, NiFeMo Nanoparticles Encapsulated within Nitrogen-Doped Reduced Graphene Oxide as Bifunctional Electrocatalysts for Zinc-Air Batteries, *ChemElectroChem*, 2021, **8**, 524-531.
